# Supplementary material for: Nanoelectrode design from microminiaturized honeycomb monolith with ultrathin and stiff nanoscaffold for high-energy micro-supercapacitors
Source: PubMed Central journal article supplement (PMC6962208; doi:10.1038/s41467-019-14170-6), 2020-01-15
Supplement: 41467_2019_14170_MOESM1_ESM.pdf [file 41467_2019_14170_MOESM1_ESM.pdf]

## **Supplementary Information for**

**Nanoelectrode design from microminiaturized honeycomb monolith with ultrathin and stiff nanoscaffold for high-energy micro-supercapacitors**

*Lei et al.*

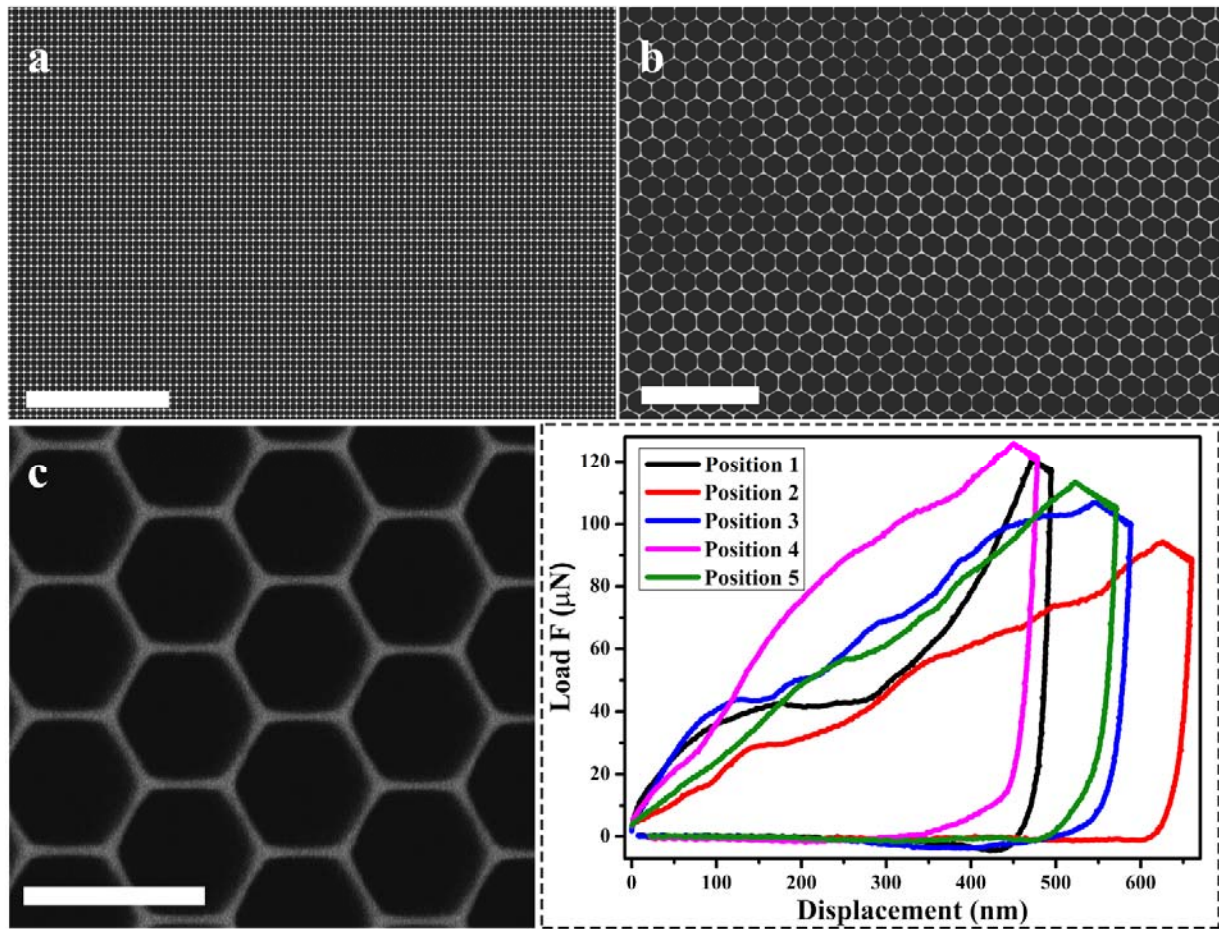

**Supplementary Figure 1 | Morphology and mechanical properties of HAN.** **a** Large-scale SEM image of HAN with square cell arrangement and 400 nm inter-cell spacing. **b** Large-scale SEM image of HAN with hexagonal cell arrangement and 800 nm inter-cell spacing. **c** The load-displacement (L-D) curves at the different positions of the HAN (hexagonal cell arrangement and 400 nm inter-cell spacing) with an indentation load of 150  $\mu\text{N}$  at room temperature. The Young's modulus of the HAN obtained from L-D curves are 3.22, 1.46, 1.50, 2.05 and 1.41 GPa at the positions 1 – 5, respectively. Scale bar: 8  $\mu\text{m}$  (**a**); 4  $\mu\text{m}$  (**b**); 500 nm (**c**)

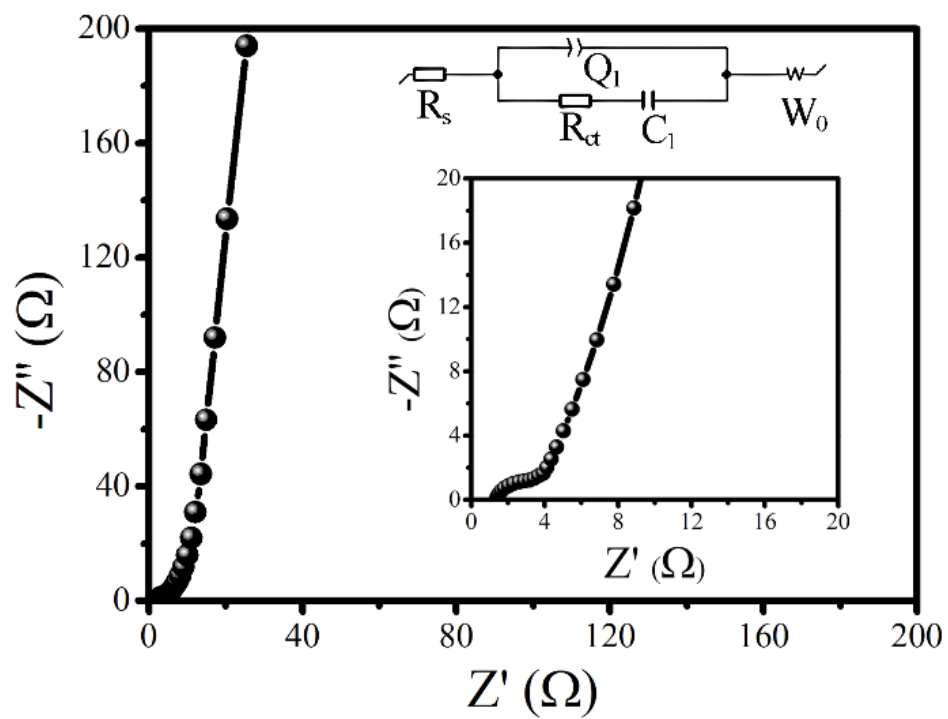

**Supplementary Figure 2 | Electrochemical impedance of HAN@SnO<sub>2</sub>.** The Nyquist plots of HAN@SnO<sub>2</sub>/HAN@SnO<sub>2</sub> device.

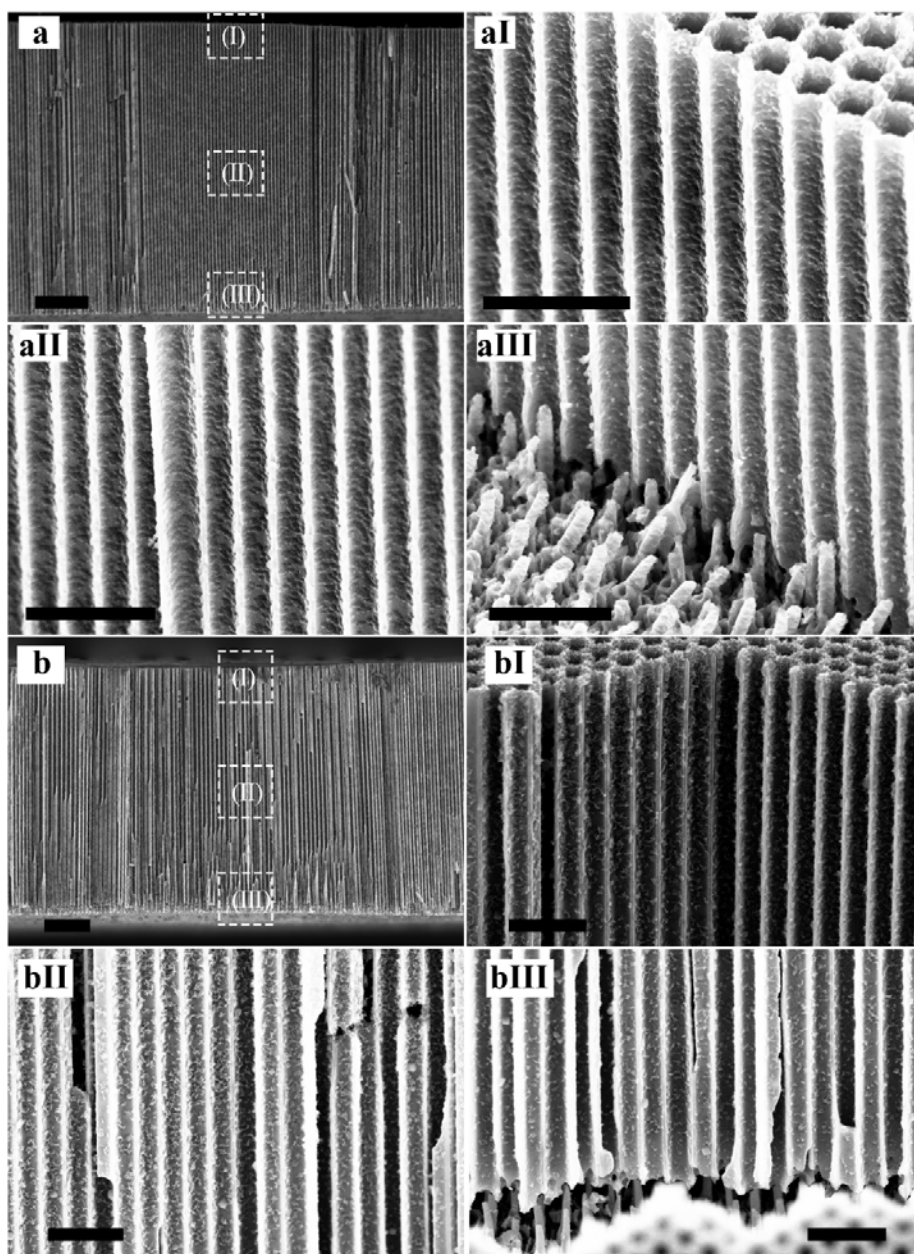

**Supplementary Figure 3 | Cross-sectional SEM images of HAN@SnO<sub>2</sub>@PPy and HAN@SnO<sub>2</sub>@MnO<sub>2</sub> electrodes with a HAN cell depth of 25 μm. a Overall view of HAN@SnO<sub>2</sub>@PPy electrode and corresponding high-resolution SEM image recorded from the region marked in aI, aII and aIII. b Overall view of HAN@SnO<sub>2</sub>@MnO<sub>2</sub> electrode and corresponding high-resolution SEM image recorded from the region marked in bI, bII and bIII. Scale bar: 5 μm (a); 1 μm (aI); 1 μm (aII); 1 μm (aIII); 5 μm (b); 1 μm (bI); 1 μm (bII); 1 μm (bIII)**

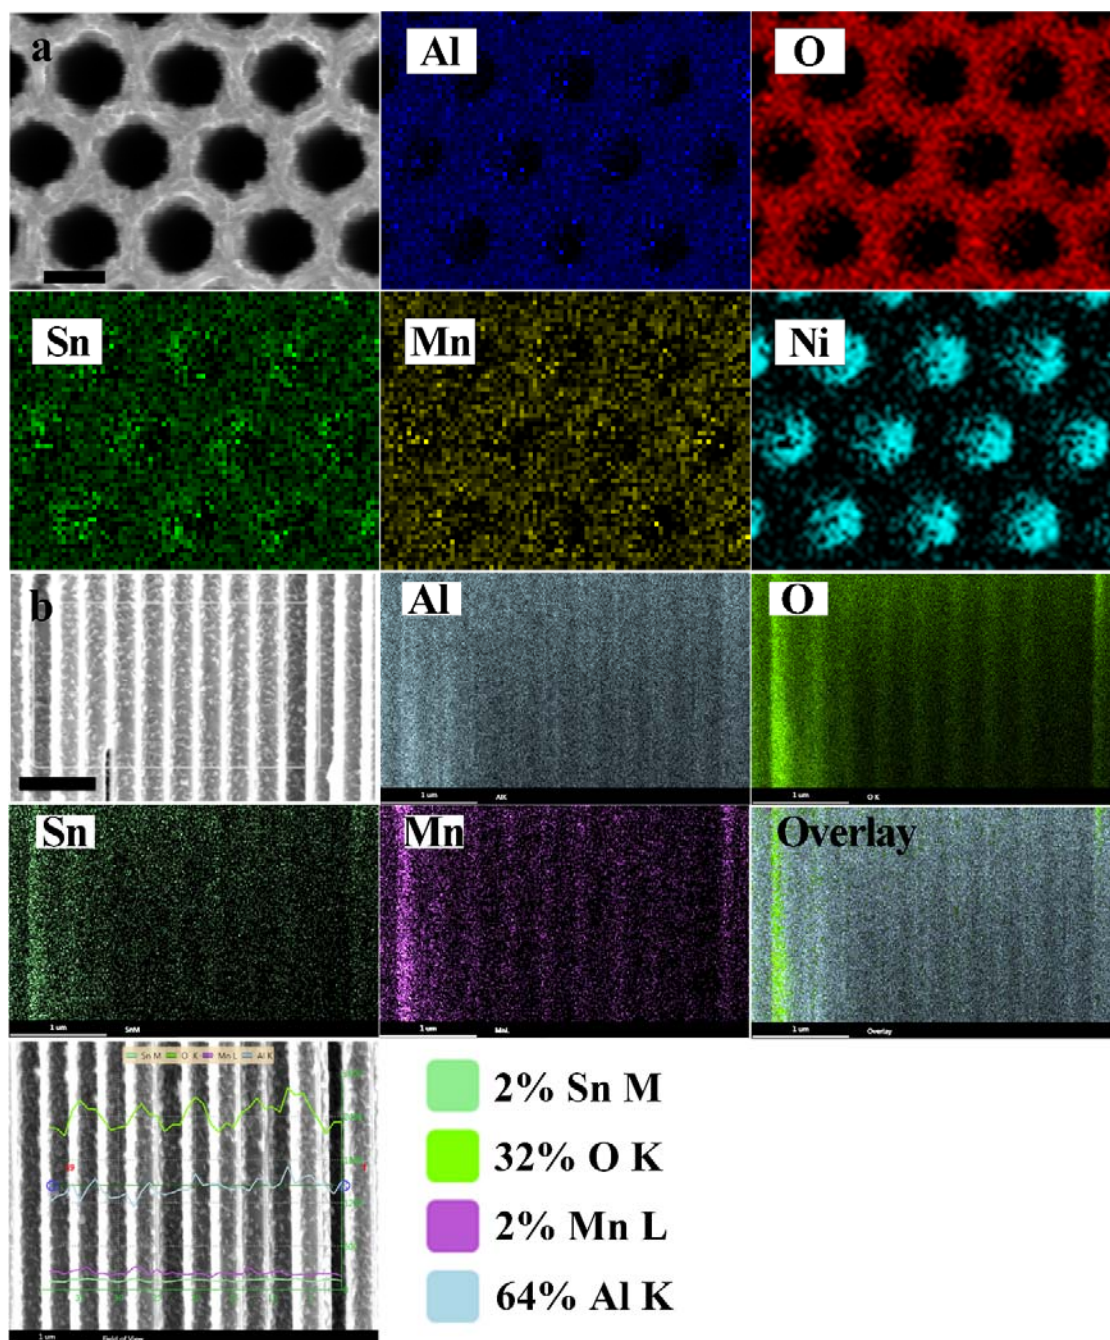

Supplementary Figure 4 | Top-view and cross-sectional EDX mapping of HAN@SnO<sub>2</sub>@MnO<sub>2</sub>. a

Top-view and b cross-sectional view. Scale bar: 250 nm (a); 1 μm (b)

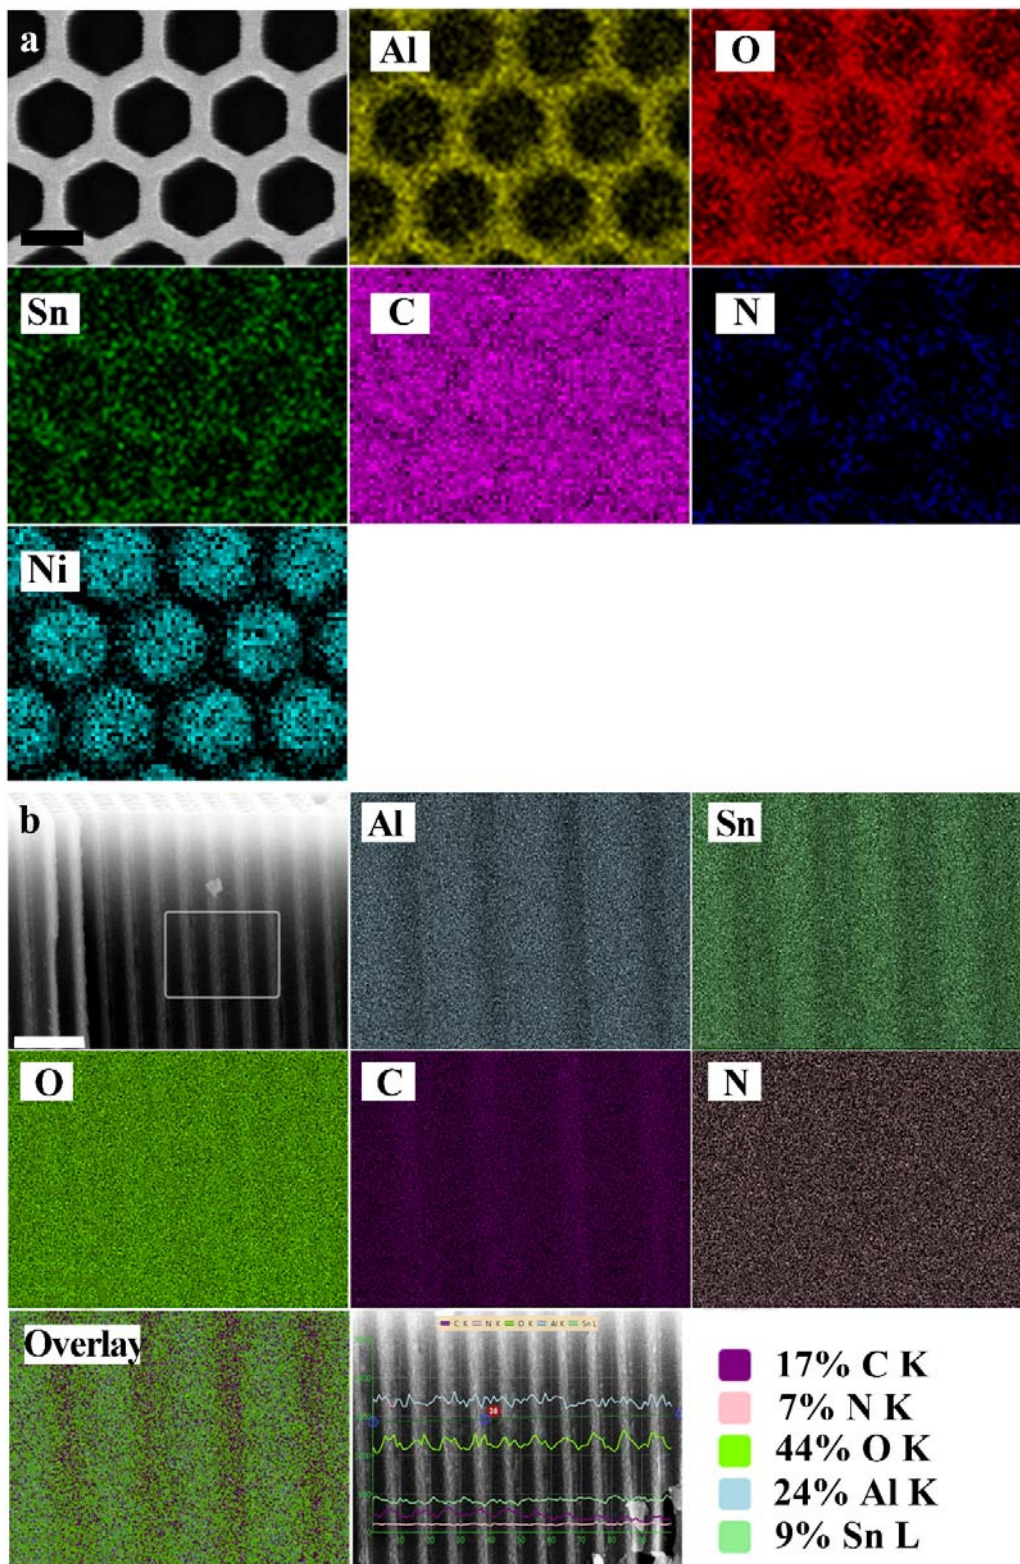

**Supplementary Figure 5 | EDX mapping of HAN@SnO<sub>2</sub>@PPy. a** Top-view and **b** cross-sectional view.

Scale bar: 250 nm (a); 500 nm (b)

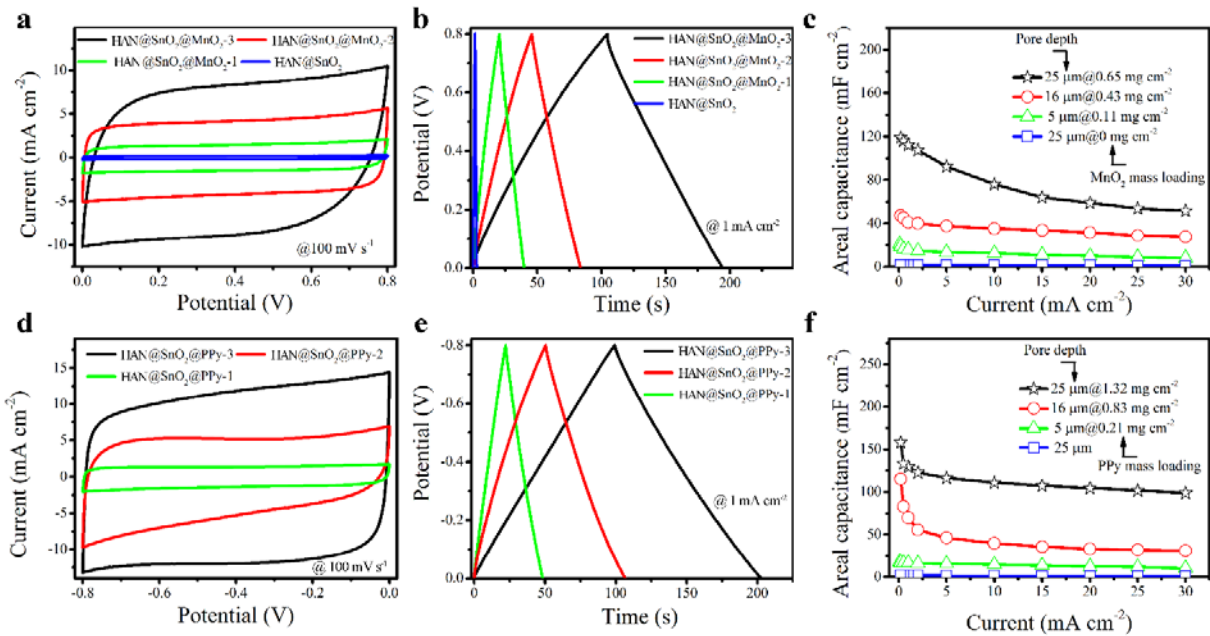

**Supplementary Figure 6 | Electrochemical performance of the symmetric stacked MSCs based on HAN-reinforced pseudocapacitive nanoelectrodes.** **a** The CV curves, **b** GCD profiles and **c** device areal capacitance as a function of current densities of HAN@SnO<sub>2</sub>@MnO<sub>2</sub>/HAN@SnO<sub>2</sub>@MnO<sub>2</sub> MSCs with different pore thickness. **d** The CV curves, **e** GCD profiles and **f** device areal capacitance as a function of current densities of HAN@SnO<sub>2</sub>@PPy/HAN@SnO<sub>2</sub>@PPy MSCs with different HAN cell depth. The electrolyte is 1.0 M Na<sub>2</sub>SO<sub>4</sub> aqueous solution.

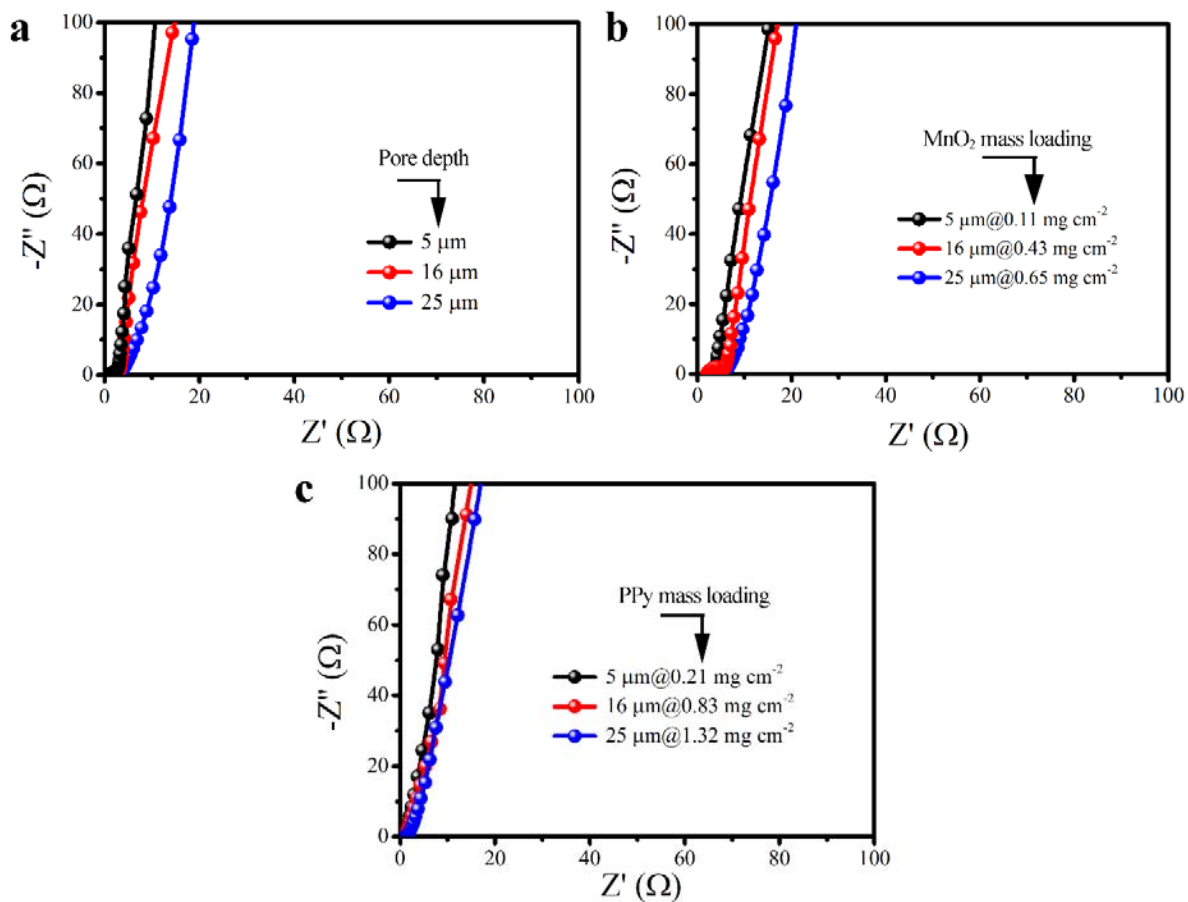

**Supplementary Figure 7 | Electrochemical impedance properties comparison of symmetric MSCs.** Warburg region of **a** HAN@SnO<sub>2</sub>, **b** HAN@SnO<sub>2</sub>@MnO<sub>2</sub>, and **c** HAN@SnO<sub>2</sub>@PPy electrodes with different pore depth of HAN. The electrolyte is 1.0 M Na<sub>2</sub>SO<sub>4</sub> aqueous solution.



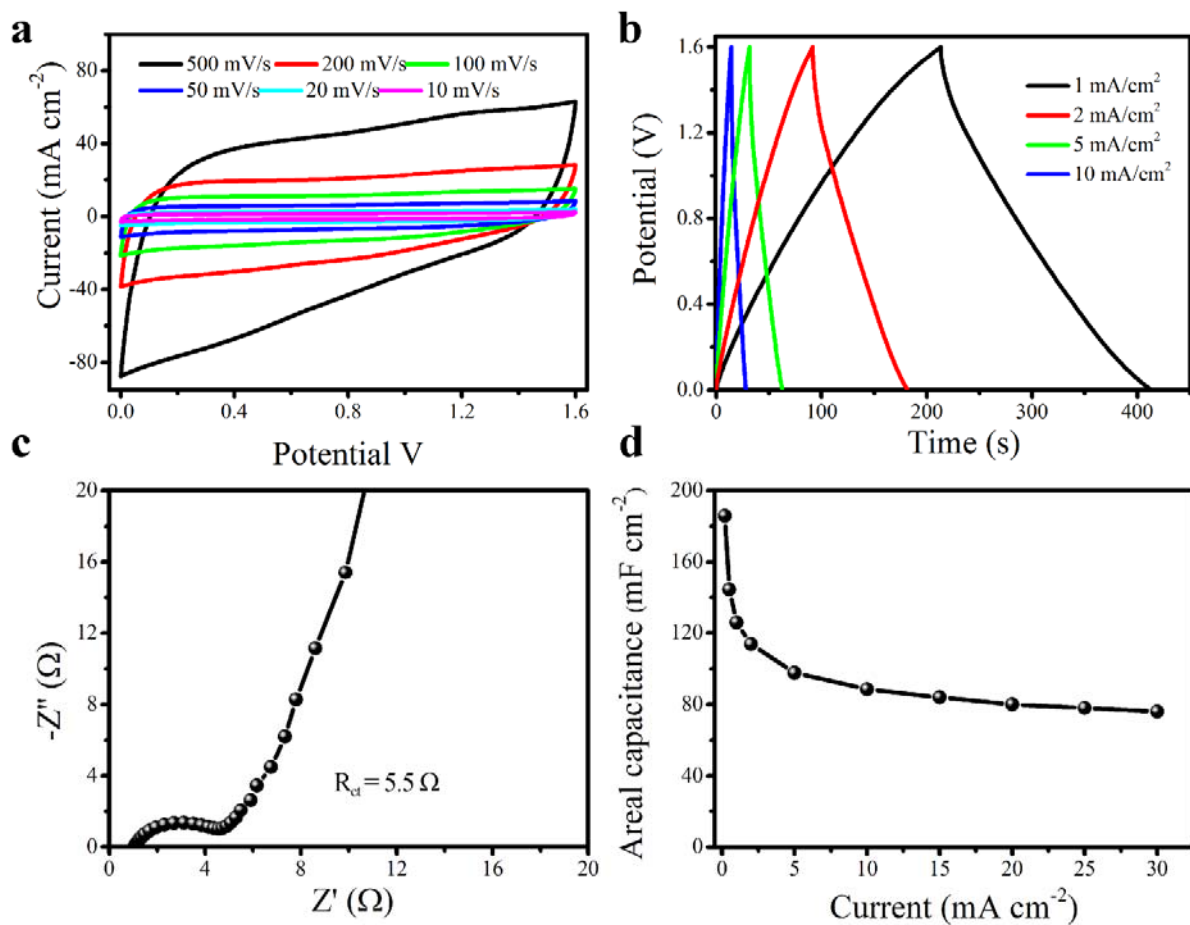

**Supplementary Figure 8 | Electrochemical performance of HAN@SnO<sub>2</sub>@MnO<sub>2</sub>//HAN@SnO<sub>2</sub>@PPy asymmetric stacked MSCs. a** The CV curves, **b** GCD profiles, **c** Nyquist plots and **d** device areal capacitance as a function of current densities of HAN@SnO<sub>2</sub>@MnO<sub>2</sub>//HAN@SnO<sub>2</sub>@PPy MSCs (For asymmetric MSCs based on positive and negative electrodes are both with 25- $\mu\text{m}$ -deep cell). The electrolyte is 1.0 M Na<sub>2</sub>SO<sub>4</sub> aqueous solution.

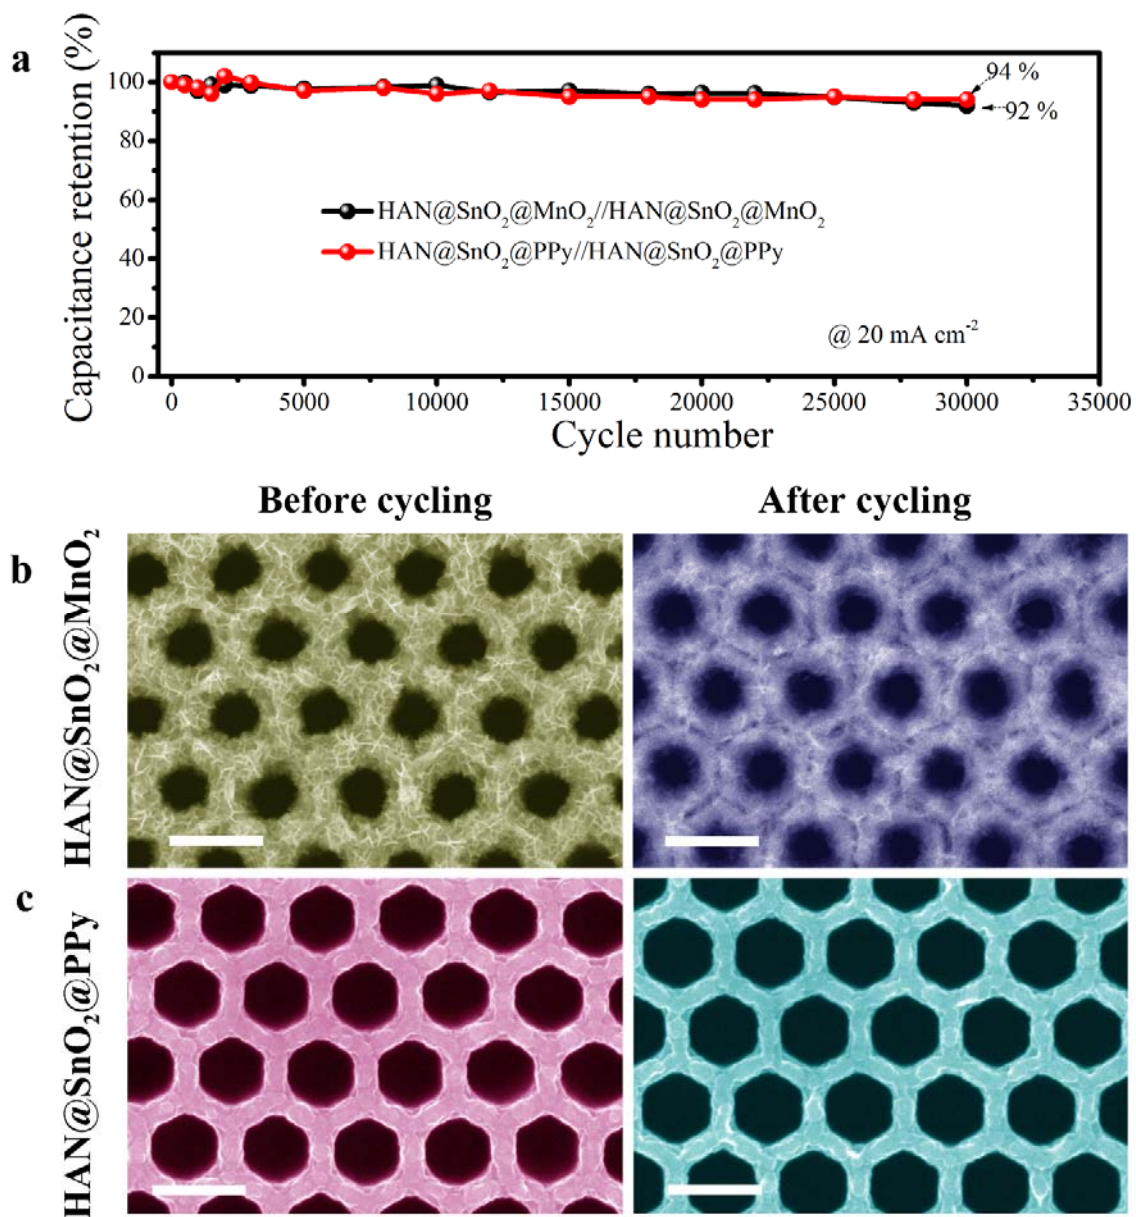

**Supplementary Figure 9 | Cyclic performance of symmetric MSCs and morphological stability of HAN-based nanoelectrodes.** **a** Cycling ability of HAN@SnO<sub>2</sub>@MnO<sub>2</sub>//HAN@SnO<sub>2</sub>@MnO<sub>2</sub> symmetric MSCs and HAN@SnO<sub>2</sub>@PPy//HAN@SnO<sub>2</sub>@PPy symmetric MSCs, respectively, measured at a current density of 20 mA cm<sup>-2</sup> for 30,000 continued charge-discharge cycles. SEM images of **b** HAN@SnO<sub>2</sub>@MnO<sub>2</sub> and **c** HAN@SnO<sub>2</sub>@PPy electrodes before (left) and after (right) 30,000 cycles. Scale bar: 400 nm (**b, c**)

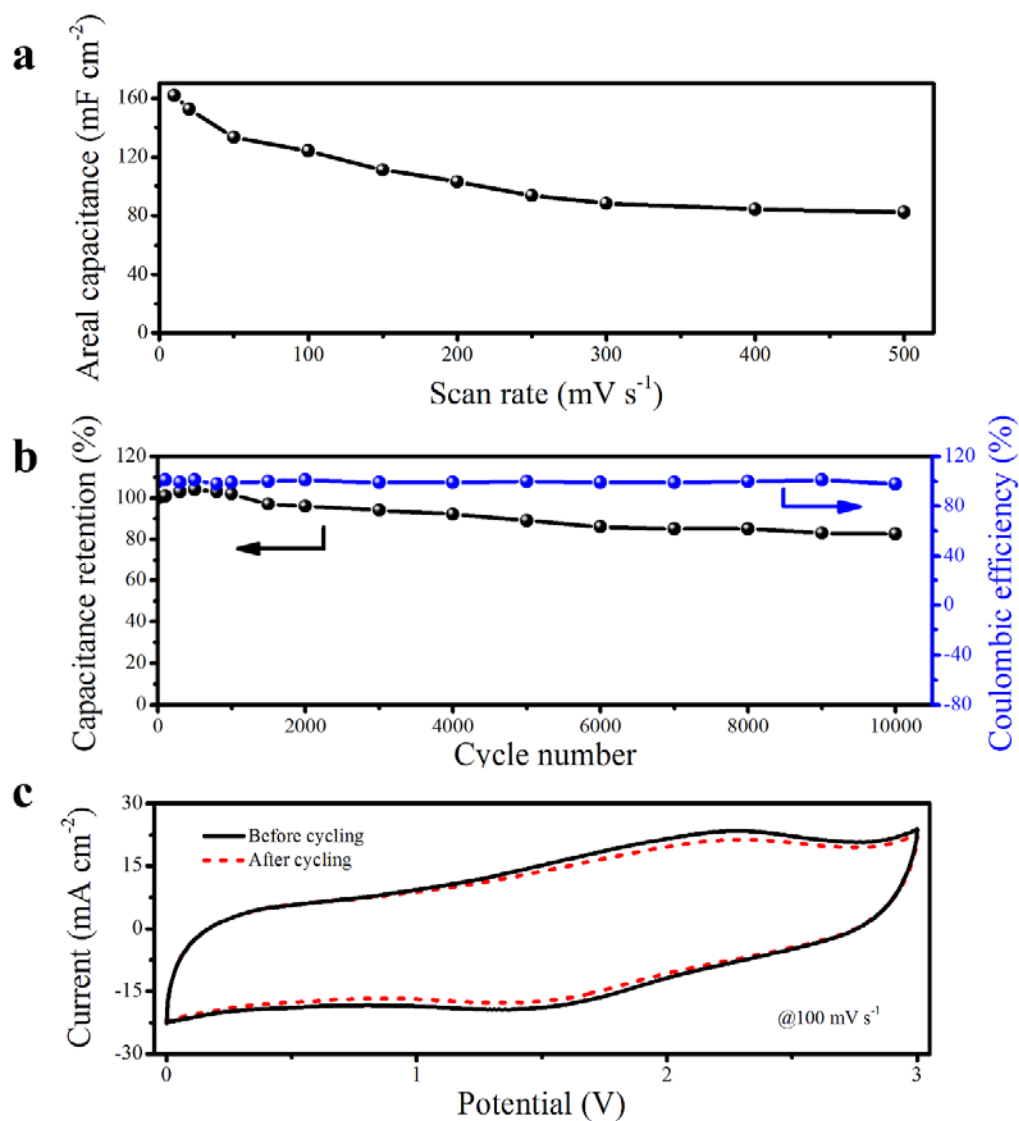

**Supplementary Figure 10 | Device capacity of HAN@SnO<sub>2</sub>@MnO<sub>2</sub>//HAN@SnO<sub>2</sub>@PPy asymmetric stacked MSCs with EMIM-TFSI electrolyte. a** Device areal capacitance as a function of scan rates of HAN@SnO<sub>2</sub>@MnO<sub>2</sub>//HAN@SnO<sub>2</sub>@PPy MSCs. **b** Cycling stability test at 20 mA cm<sup>-2</sup> for 10000 times and **c** corresponding CV curves at 100 mV s<sup>-1</sup> before and after cycling. The positive and negative electrodes are both with 25- $\mu\text{m}$ -deep HAN.

**Supplementary Table 1 | Performances of state-of-the-art MSCs.** Device performance of HAN@SnO<sub>2</sub>@MnO<sub>2</sub>//HAN@SnO<sub>2</sub>@PPy (abbreviated as MnO<sub>2</sub>//PPy) in comparison with various MSCs reported recently.

| Electrode material                                | Electrode thickness (μm) | Electrolyte                                | Potential window (V) | Device capacitance (mF cm <sup>-2</sup> ) | Device energy (μWh cm <sup>-2</sup> ) | Device power (mW cm <sup>-2</sup> ) | Cycling stability | C <sub>1000</sub> /C <sub>0</sub> (%) | Ref. |
|---------------------------------------------------|--------------------------|--------------------------------------------|----------------------|-------------------------------------------|---------------------------------------|-------------------------------------|-------------------|---------------------------------------|------|
| Graphene                                          | 0.7                      | PSSH                                       | 1.0                  | <1                                        | <1                                    | <1                                  | 11,000            | ~100                                  | 1    |
| PG                                                | 2.0                      | BMIMPF <sub>6</sub>                        | 3.0                  | <1                                        | <1                                    | <1                                  | 2,000             | ~100                                  | 2    |
| CNTCs                                             | 20                       | BMIM-BF <sub>4</sub>                       | 3.0                  | 6                                         | 3.6                                   | 69                                  | 8,000             | ~100                                  | 3    |
| ACF                                               | 1.5                      | 1 M H <sub>2</sub> SO <sub>4</sub>         | 0.6                  | <1                                        | <1                                    | -                                   | 10,000            | ~100                                  | 4    |
| OLC                                               | 7                        | 1 M Et <sub>4</sub> NBF <sub>4</sub> in PC | 3.0                  | <1                                        | <1                                    | 177                                 | 10,000            | ~100                                  | 5    |
| AC                                                | 5                        | 0.5 M H <sub>2</sub> SO <sub>4</sub>       | 3.0                  | <1                                        | <1                                    | 20                                  | 10,000            | ~100                                  | 5    |
| LWG                                               | 20                       | 1.0 M TEABF <sub>4</sub>                   | 1.0                  | 2.5                                       | <1                                    | -                                   | 10,000            | ~100                                  | 6    |
| Graphene                                          | 25                       | 1 M H <sub>2</sub> SO <sub>4</sub>         | 1.0                  | 4                                         | <1                                    | 9                                   | 9,000             | ~98                                   | 7    |
| PEDOT                                             | 2.4                      | 1 M H <sub>2</sub> SO <sub>4</sub>         | 0.8                  | 18.7                                      | 2                                     | 0.2                                 | 1,000             | ~90                                   | 8    |
| CDC                                               | 4.1                      | 2 M EMIBF <sub>4</sub> in AN               | 3.0                  | 41.8                                      | 40                                    | 30                                  | 11,000            | ~100                                  | 9    |
| LSG/MnO <sub>2</sub>                              | 15                       | 1 M Na <sub>2</sub> SO <sub>4</sub>        | 0.9                  | 385                                       | 60                                    | -                                   | 10,000            | 100                                   | 10   |
| MnO <sub>2</sub> //Bi <sub>2</sub> O <sub>3</sub> | -                        | 1 M Na <sub>2</sub> SO <sub>4</sub>        | 1.8                  | 97                                        | 43.4                                  | 12.9                                | 4,000             | 90                                    | 11   |
| MnO <sub>2</sub> //PPY                            | 1.8                      | 1 M Na <sub>2</sub> SO <sub>4</sub>        | 1.7                  | ~30                                       | ~10                                   | 0.5                                 | 2,000             | 90                                    | 12   |

|                                                 |              |                                         |            |            |            |           |               |             |             |
|-------------------------------------------------|--------------|-----------------------------------------|------------|------------|------------|-----------|---------------|-------------|-------------|
| NN@MnO <sub>2</sub>                             | 5            | 1 M Na <sub>2</sub> SO <sub>4</sub>     | 0.8        | ~100       | 20         | 10        | 5,000         | ~90         | 13          |
| Zn NSs                                          | 50           | 2 M ZnSO <sub>4</sub>                   | 1.5        | ~324       | 115        | 0.16      | 10,000        | ~100        | 14          |
| rGO/IL/CP                                       | 0.3          | PVA-H <sub>3</sub> PO <sub>4</sub>      | 3.0        | 27.4       | 32         | 1.05      | -             | -           | 15          |
| MXene                                           | -            | PVA-H <sub>2</sub> SO <sub>4</sub>      | 0.5        | 43         | 0.32       | 0.15      | 14,000        | ~97         | 16          |
| MHCF                                            | ~0.18        | PVA-LiCl                                | 1.8        | 19.8       | 9.49       | -         | 5,000         | 96.8        | 17          |
| MXene                                           | 3.2          | EMIMBF <sub>4</sub> /PVDF-HFP           | 3.0        | 42         | 13.9       | 4.5       | 10,000        | ~100        | 18          |
| Y-Ti <sub>3</sub> C <sub>2</sub> T <sub>x</sub> | ~0.1         | PVA/H <sub>2</sub> SO <sub>4</sub>      | 0.6        | 61         | 0.63       | 0.33      | 10,000        | 93.7        | 19          |
| WJM-G-SWCNTs                                    | ~23          | PVA-H <sub>3</sub> PO <sub>4</sub>      | 1.8        | 1.32       | 0.064      | 20        | 10,000        | ~100        | 20          |
| H-SiC                                           | ~16          | PVA-KCl                                 | 0.8        | 23.6       | 5.2        | 11.2      | 10,000        | 94          | 21          |
| Cu(OH) <sub>2</sub> @FeOOH                      | 14           | EMIMBF <sub>4</sub>                     | 1.5        | 58         | 18         | -         | 10,000        | 80          | 22          |
| 3D RuO <sub>2</sub>                             | 46           | 0.5 M H <sub>2</sub> SO <sub>4</sub>    | 0.9        | -          | 91.4       | -         | 2,000         | ~100        | 23          |
| PDMS/GF                                         | 260          | 0.5 M Na <sub>2</sub> SO <sub>4</sub>   | 1.6        | 592        | 106        | 16        | 12,000        | ~100        | 24          |
| Ni-CAT MOF                                      | ~200         | PVA-LiCl                                | 1.4        | 15.2       | 4.1        | 7         | 5,000         | 87          | 25          |
| MnO <sub>2</sub> -ITO NWs                       | 28           | 1 M Na <sub>2</sub> SO <sub>4</sub>     | 1.0        | 194        | 27         | 15        | 20,000        | 61          | 26          |
| <b>MnO<sub>2</sub>//PPy</b>                     | <b>25 μm</b> | <b>1 M Na<sub>2</sub>SO<sub>4</sub></b> | <b>1.6</b> | <b>186</b> | <b>66</b>  | <b>24</b> | <b>30,000</b> | <b>~100</b> | <b>This</b> |
| <b>MnO<sub>2</sub>//PPy</b>                     | <b>25 μm</b> | <b>EMIM-TFSI</b>                        | <b>3.0</b> | <b>128</b> | <b>160</b> | <b>40</b> | <b>10,000</b> | <b>~100</b> | <b>work</b> |

## References

1. Li, J., et al. Scalable Fabrication and Integration of Graphene Microsupercapacitors through Full Inkjet Printing. *ACS Nano* **11**, 8249-8256 (2017).
2. Xiao, H., et al. One-step device fabrication of phosphorene and graphene interdigital micro-supercapacitors with high energy density. *ACS Nano* **11**, 7284-7292 (2017).
3. Lin, J., et al. 3-dimensional graphene carbon nanotube carpet-based microsupercapacitors with high electrochemical performance. *Nano Lett.* **13**, 72-78 (2012).
4. Wei, L., Nitta, N. & Yushin, G. Lithographically patterned thin activated carbon films as a new technology platform for on-chip devices. *ACS Nano* **7**, 6498-6506 (2013).
5. Pech, D., et al. Ultrahigh-power micrometre-sized supercapacitors based on onion-like carbon. *Nat. Nanotechnol.* **5**, 651-654 (2010).
6. Gao, W., et al. Direct laser writing of micro-supercapacitors on hydrated graphite oxide films. *Nat. Nanotechnol.* **6**, 496–500 (2011).
7. Lin, J., et al. Laser-induced porous graphene films from commercial polymers. *Nat. Commun.* **5**, 5714 (2014).
8. Kurra, N., Hota, M. K. & Alshareef, H. N. Conducting polymer micro-supercapacitors for flexible energy storage and AC line-filtering. *Nano Energy* **13**, 500-508 (2015).
9. Huang, P., et al. On-chip and freestanding elastic carbon films for micro-supercapacitors. *Science* **351**, 691-695 (2016).
10. El-Kady, M. F., et al. Engineering three-dimensional hybrid supercapacitors and microsupercapacitors for high-performance integrated energy storage. *Proc. Natl. Acad.*

- Sci. U.S.A.* **112**, 4233-4238 (2015).
11. Xu, H., Hu, X., Yang, H., Sun, Y., Hu, C. & Huang, Y. Flexible asymmetric micro-supercapacitors based on Bi<sub>2</sub>O<sub>3</sub> and MnO<sub>2</sub> nanoflowers: larger areal mass promises higher energy density. *Adv. Energy Mater.* **5**, 1401882 (2015).
  12. Grote, F. & Lei, Y. A complete three-dimensionally nanostructured asymmetric supercapacitor with high operating voltage window based on PPy and MnO<sub>2</sub>. *Nano Energy* **10**, 63-70 (2014).
  13. Liu, L., Zhao, H., Wang, Y., Fang, Y., Xie, J. & Lei, Y. Evaluating the role of nanostructured current collectors in energy storage capability of supercapacitor electrodes with thick electroactive materials layer. *Adv. Funct. Mater.* **28**, 1705107 (2018).
  14. Zhang, P., et al. Zn-ion hybrid micro-supercapacitors with ultrahigh areal energy density and long-term durability. *Adv. Mater.* **31**, 1806005 (2018).
  15. Gao, J., et al. Laser-assisted multiscale fabrication of configuration-editable supercapacitors with high energy density. *ACS Nano* **13**, 7463-7470 (2019).
  16. Zhang, C. J., et al. Additive-free MXene inks and direct printing of micro-supercapacitors. *Nat. Commun.* **10**, 1795 (2019).
  17. He, Y., et al. Nano-sandwiched metal hexacyanoferrate/graphene hybrid thin films for in-plane asymmetric micro-supercapacitors with ultrahigh energy density. *Mater. Horiz.* **6**, 1041-1049 (2019).
  18. Zheng, S., et al. Ionic liquid pre-intercalated MXene films for ionogel-based flexible micro-supercapacitors with high volumetric energy density. *J. Mater. Chem. A* **7**,

- 9478-9485 (2019).
19. Zhang, C., et al. Stamping of flexible, coplanar micro-supercapacitors using MXene inks. *Adv. Funct. Mater.* **28**, 1705506 (2018).
  20. Bellani, S., et al. Scalable production of graphene inks via wet-jet milling exfoliation for screen-printed micro-supercapacitors. *Adv. Funct. Mater.* **29**, 1807659 (2019).
  21. Li, W., et al. All-solid-state on-chip supercapacitors based on free-standing 4H-SiC nanowire arrays. *Adv. Energy Mater.* **9**, 1900073 (2019).
  22. Xie, J.-Q., et al. In situ growth of Cu(OH)<sub>2</sub>@FeOOH nanotube arrays on catalytically deposited Cu current collector patterns for high-performance flexible in-plane micro-sized energy storage devices. *Energy Environ. Sci.* **12**, 194-205 (2019).
  23. Ferris, A., Bourrier, D., Garbarino, S., Guay, D. & Pech, D. 3D Interdigitated microsupercapacitors with record areal cell capacitance. *Small* **15**, 1901224 (2019).
  24. Wang, Y., et al. Monolithic integration of all-in-one supercapacitor for 3D electronics. *Adv. Energy Mater.* **9**, 1900037 (2019).
  25. Wu, H., Zhang, W., Kandambeth, S., Shekhah, O., Eddaoudi, M. & Alshareef, H. N. Conductive metal-organic frameworks selectively grown on laser-scribed graphene for electrochemical microsupercapacitors. *Adv. Energy Mater.* **9**, 1900482 (2019).
  26. Du, J., et al. High-performance pseudocapacitive microsupercapacitors with three-dimensional current collector of vertical ITO nanowire arrays. *J. Mater. Chem. A* **7**, 6220-6227 (2019).
